# Supplementary material for: Pre-pandemic antibodies screening against SARS-CoV-2 and virus detection among children diagnosed with eruptive fevers
Source: PubMed Central journal article supplement — Int J Immunopathol Pharmacol. 2024 Jun 5;38:03946320241260633. doi: 10.1177/03946320241260633 (PMC11155355; doi:10.1177/03946320241260633), 2024-06-05
Supplement: sj-pdf-1-iji-10.1177_03946320241260633.pdf [file sj-pdf-1-iji-10.1177_03946320241260633.pdf]

**Supplementary Data**

**Supplementary Table S1.** RT-PCR multiplex Assay details

| <b>Viruses and Bacteria in; BIOFIRE® FILMARRAY® Pneumonia plus Panel Test</b> |                                                      |
|-------------------------------------------------------------------------------|------------------------------------------------------|
| <b>Viruses</b>                                                                | <b>Bacteria (semi-quantitative)</b>                  |
| Influenza A                                                                   | <i>Acinetobacter calcoaceticus-baumannii complex</i> |
| Influenza B                                                                   | <i>Enterobacter cloacae</i>                          |
| Adenovirus                                                                    | <i>Escherichia coli</i>                              |
| Human Coronaviruses (229E, -OC43, -NL63, and -HKU1)                           | <i>Haemophilus influenzae</i>                        |
| Parainfluenza virus                                                           | <i>Klebsiella aerogenes</i>                          |
| Respiratory Syncytial virus                                                   | <i>Klebsiella oxytoca</i>                            |
| Human Rhinovirus/Enterovirus                                                  | <i>Klebsiella pneumoniae group</i>                   |
| Human Metapneumovirus                                                         | <i>Moraxella catarrhalis</i>                         |
| Middle East Respiratory Syndrome Coronavirus (MERS-CoV)                       | <i>Proteus spp.</i>                                  |
| <b>Atypical Bacteria (qualitative)</b>                                        | <i>Pseudomonas aeruginosa</i>                        |
| <i>Legionella pneumophila</i>                                                 | <i>Serratia marcescens</i>                           |
| <i>Mycoplasma pneumoniae</i>                                                  | <i>Streptococcus aureus</i>                          |
| <i>Chlamydia pneumoniae</i>                                                   | <i>Streptococcus agalactiae</i>                      |
|                                                                               | <i>Streptococcus pneumoniae</i>                      |
|                                                                               | <i>Streptococcus pyogenes</i>                        |

Supplementary Data for Figure 2. Raw Calculated **Index values** for All the tested sera

| <b>Negative</b> | <b>Ambiguous</b> | <b>Positive</b> |
|-----------------|------------------|-----------------|
| 3,376238        | 4,277228         | 6,237624        |
| 3,821782        | 5,009901         | 9,722772        |
| 0,930693        | 4,722772         | 6,722772        |
| 2,910891        | 4,574257         | 7,623762        |
| 3,920792        | 4,712871         | 6,009901        |
| 1,881188        | 4,920792         | 7,148515        |
| 2,465347        | 4,29703          | 7,643564        |
| 1,524752        | 5,910891         | 7,227723        |
| 3,376238        | 5,287129         | 7,549669        |
| 1,425743        | 4,980198         | 12,55445545     |
| 1,594059        | 5,435644         | 15,64356436     |
| 2,079208        | 4,435644         | 32,53465347     |
| 3,247525        | 5,445545         | 11,45544554     |
| 2,653465        | 5,262693         | 48,12871287     |
| 2,138614        |                  | 4,12362         |
| 3,19802         |                  |                 |
| 2,178218        |                  |                 |
| 2,079208        |                  |                 |
| 1,247525        |                  |                 |
| 3,930693        |                  |                 |

|          |
|----------|
| 3,415842 |
| 3,90099  |
| 2,732673 |
| 3,287129 |
| 2,455446 |
| 2,861386 |
| 2,891089 |
| 3,118812 |
| 2,950495 |
| 1,811881 |
| 1,277228 |
| 2,861386 |
| 2,683168 |
| 2,564356 |
| 1,386139 |
| 3,455446 |
| 3,19802  |
| 1,613861 |
| 2,594059 |
| 2,148515 |
| 3,752475 |
| 3,376238 |
| 1,594059 |
| 1,633663 |
| 3,544554 |
| 3,722772 |
| 2,70297  |
| 2,138614 |
| 1,851485 |
| 1,851485 |
| 1,514851 |
| 3,643564 |
| 3,247525 |
| 1,316832 |
| 2,544554 |
| 1,594059 |
| 1,425743 |
| 5,831683 |
| 1,841584 |
| 2,306931 |
| 1,633663 |
| 1,821782 |
| 2,227723 |

|          |
|----------|
| 1,584158 |
| 2,920792 |
| 3,311258 |
| 3,364238 |
| 3,320088 |
| 1,245033 |
| 3,682119 |
| 0,821192 |
| 2,401766 |
| 2,472406 |
| 0,997792 |
| 2,437086 |
| 1,501104 |

|                 |
|-----------------|
| <b>Positive</b> |
| 6,237624        |
| 9,722772        |
| 6,722772        |
| 7,623762        |
| 6,009901        |
| 7,148515        |
| 7,643564        |
| 7,227723        |
| 7,549669        |
| 12,55445545     |
| 15,64356436     |
| 32,53465347     |
| 11,45544554     |
| 48,12871287     |
|                 |
